# Supplementary material for: Progress and future challenges in passive NO adsorption over Pd/zeolite catalysts
Source: Royal Society of Chemistry journal article supplement (doi:10.1039/d1cy01084k), 2021-01-01
Supplement: d1cy01084k1.pdf [file d1cy01084k1.pdf]

# **Progress and future challenges in passive NO adsorption over Pd/zeolite catalysts**

*Huawang Zhao <sup>a&</sup>, Alexander J. Hill <sup>b&</sup>, Lei Ma <sup>c</sup>, Adarsh Bhat <sup>b</sup>, Guohua Jing <sup>a\*</sup>, Johannes W. Schwank <sup>b</sup>*

*a. Department of Environmental Science & Engineering, College of Chemical Engineering, Huaqiao University, Xiamen, Fujian 361021, China*

*b. Department of Chemical Engineering, University of Michigan, Ann Arbor, MI 48109, USA*

*c. School of Environmental Science and Engineering, Shanghai Jiao Tong University, Shanghai 200240, China*

---

& H.W. Zhao and A.J. Hill contributed equally. \*Corresponding author: [zhoujing@hqu.edu.cn](mailto:zhoujing@hqu.edu.cn).

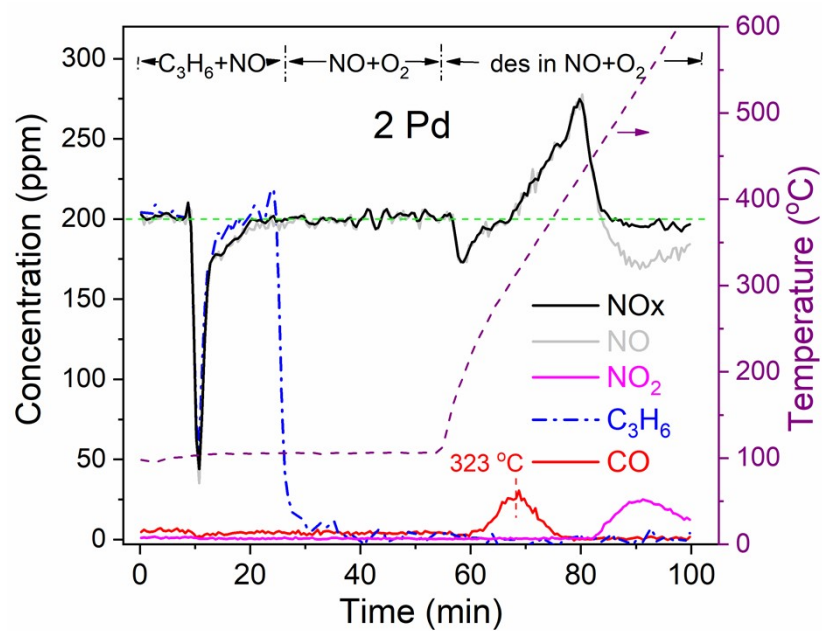

Fig. S1. NO + C<sub>3</sub>H<sub>6</sub> co-adsorption and release on Pd/SSZ-13 with Pd loading of 2 wt. %; Feed gas: 200 ppm NO, 200 ppm C<sub>3</sub>H<sub>6</sub> (when applied), 10 % O<sub>2</sub>, 5 % CO<sub>2</sub>, 5 % H<sub>2</sub>O, balanced with N<sub>2</sub>.
